# Supplementary material for: Post-acute COVID-19 neuropsychiatric symptoms are not associated with ongoing nervous system injury
Source: PubMed Central journal article supplement (PMC10789589; doi:10.1093/braincomms/fcad357), 2023-12-27
Supplement: fcad357_supplementary_data.pdf [file fcad357_supplementary_data.pdf]

# Supplementary material

## Post-acute COVID-19 neuropsychiatric symptoms are not associated with ongoing nervous system injury

### PHOSP-COVID Collaborative Group

#### Core Management Group

*Chief Investigator* C E Brightling, *Members* R A Evans (Lead Co-I), L V Wain (Lead Co-I), J D Chalmers, V C Harris, L P Ho, A Horsley, M Marks, K Poinasamy, B Raman, A Shikotra, A Singapuri

#### PHOSP-COVID Study Central Coordinating Team

C E Brightling (Chief Investigator), R A Evans (*Lead Co-I*), L V Wain (*Lead Co-I*), R Dowling, C Edwardson, O Elneima, S Finney, N J Greening, B Hargadon, V Harris, L Houchen--Wolloff, O C Leavy, H J C McAuley, C Overton, T Plekhanova, R M Saunders, M Sereno, A Singapuri, A Shikotra, C Taylor, S Terry, C Tong, B Zhao

#### Steering Committee

*Co-chairs* D Lomas, E Sapey, *Institution representatives* C Berry, C E Bolton, N Brunskill, E R Chilvers, R Djukanovic, Y Ellis, D Forton, N French, J George, N A Hanley, N Hart, L McGarvey, N Maskell, H McShane, M Parkes, D Peckham, P Pfeffer, A Sayer, A Sheikh, A A R Thompson, N Williams and core management group representation

#### Executive Board

*Chair* C E Brightling, representation from the core management group, each working group and platforms

#### Platforms

##### Bioresource

W Greenhalf (*Co-Lead*), M G Semple (*Co-Lead*), M Ashworth, H E Hardwick, L Lavelle-Langham, W Reynolds, M Sereno, R M Saunders, A Singapuri, V Shaw, A Shikotra, B Venson, L V Wain

##### Data Hub

A B Docherty (*Co-Lead*), E M Harrison (*Co-Lead*), A Sheikh (*Co-Lead*), J K Baillie, C E Brightling, L Daines, R Free, R A Evans, S Kerr, O C Leavy, N I Lone, H J C McAuley, R Pius, J Quint, M Richardson, M Sereno, M Thorpe, L V Wain

##### Imaging Alliance

M Halling-Brown (*Co-Lead*), F Gleeson (*Co-Lead*), J Jacob (*Co-Lead*), S Neubauer (*Co-Lead*) B Raman (*Co-Lead*) S Siddiqui (*Co-Lead*) J M Wild (*Co-Lead*), S Aslani, P Jezzard, H Lamlum, W Lilaonitkul, E Tunnicliffe, J Willoughby

## **Omics**

L V Wain (*Co-Lead*), J K Baillie (*Co-Lead*), H Baxendale, C E Brightling, M Brown, J D Chalmers, R A Evans, B Gooptu, W Greenhalf, H E Hardwick, R G Jenkins, D Jones, I Koychev, C Langenberg, A Lawrie, P L Molyneaux, A Shikotra, J Pearl, M Ralser, N Sattar, R M Saunders, J T Scott, T Shaw, D Thomas, D Wilkinson

## **Working Groups**

### **Airways**

L G Heaney (*Co-Lead*), A De Soyza (*Co-Lead*), D Adeloye, C E Brightling, J S Brown, J Busby, J D Chalmers, C Echevarria, L Daines, O Elneima, RA Evans, J Hurst, P Novotny, P Pfeffer, K Poinasamy, J Quint, I Rudan, E Sapey, M Shankar-Hari, A Sheikh, S Siddiqui, S Walker, B Zheng

### **Brain**

J R Geddes (*Lead*), M Hotopf (*Co-Lead*), K Abel, R Ahmed, L Allan, C Armour, D Baguley, D Baldwin, C Ballard, K Bhui, G Breen, M Broome, T Brugha, E Bullmore, D Burn, F Callard, J Cavanagh, T Chalder, D Clark, A David, B Deakin, H Dobson, B Elliott, J Evans, R Francis, E Guthrie, P Harrison, M Henderson, A Hosseini, N Huneke, M Husain, T Jackson, I Jones, T Kabir, P Kitterick, A Korszun, I Koychev, J Kwan, A Lingford-Hughes, P Mansoori, H McAllister-Williams, K McIvor, L Milligan, R Morriss, E Mukaetova-Ladinska, K Munro, A Nevado-Holgado, T Nicholson, S Paddick, C Pariante, J Pimm, K Saunders, M Sharpe, G Simons, R Upthegrove, S Wessely

### **Cardiac**

G P McCann (*Lead*), S Amoils, C Antoniadis, A Banerjee, R Bell, A Bularga, C Berry, P Chowienczyk, J P Greenwood, A D Hughes, K Khunti, L Kingham, C Lawson, K Mangion, N L Mills, A J Moss, S Neubauer, B Raman, A N Sattar, C L Sudlow, M Toshner,

### **Immunology**

P J M Openshaw (*Lead*), D Altmann, J K Baillie, R Batterham, H Baxendale, N Bishop, C E Brightling, P C Calder, R A Evans, J L Heaney, T Hussell, P Klenerman, J M Lord, P Moss, S L Rowland-Jones, W Schwaeble, M G Semple, R S Thwaites, L Turtle, L V Wain, S Walmsley, D Wraith

### **Intensive Care**

M J Rowland (*Lead*), A Rostron (*Co-Lead*), J K Baillie, B Connolly, A B Docherty, N I Lone, D F McAuley, D Parekh, A Rostron, J Simpson, C Summers

### **Lung Fibrosis**

R G Jenkins (*Co-Lead*), J Porter (*Co-Lead*), R J Allen, R Aul, J K Baillie, S Barratt, P Beirne, J Blaikley, R C Chambers, N Chaudhuri, C Coleman, E Denny, L Fabbri, P M George, M Gibbons, F Gleeson, B Gooptu, B Guillen Guio, I Hall, N A Hanley, L P Ho, E Hufton, J Jacob, I Jarrold, G Jenkins, S Johnson, M G Jones, S Jones, F Khan, P Mehta, J Mitchell, P L Molyneaux, J E Pearl, K Piper Hanley, K Poinasamy, J Quint, D Parekh,

P Rivera-Ortega, L C Saunders, M G Semple, J Simpson, D Smith, M Spears, L G Spencer, S Stanel, I Stewart, A A R Thompson, D Thickett, R Thwaites, L V Wain, S Walker, S Walsh, J M Wild, D G Wootton, L Wright

### **Metabolic**

S Heller (*Co-Lead*), M J Davies (*Co-Lead*), H Atkins, S Bain, J Dennis, K Ismail, D Johnston, P Kar, K Khunti, C Langenberg, P McArdle, A McGovern, T Peto, J Petrie, E Robertson, N Sattar, K Shah, J Valabhji, B Young

### **Pulmonary and Systematic Vasculature**

L S Howard (*Co-Lead*), Mark Toshner (*Co-Lead*), C Berry, P Chowienczyk, D Lasserson, A Lawrie, O C Leavy, J Mitchell, L Price, J Quint, J Rosedale, N Sattar, C Sudlow, A A R Thompson, J M Wild, M Wilkins

### **Rehabilitation, Sarcopenia and Fatigue**

S J Singh (*Co-Lead*), W D-C Man (*Co-Lead*), J M Lord (*Co-Lead*), N J Greening (*Co-Lead*), T Chalder (*Co-Lead*), J T Scott (*Co-Lead*), N Armstrong, E Baldry, M Baldwin, N Basu, M Beadsworth, L Bishop, C E Bolton, A Briggs, M Buch, G Carson, J Cavanagh, H Chinoy, E Daynes, S Defres, R A Evans, P Greenhaff, S Greenwood, M Harvie, M Husain, S MacDonald, A McArdle, H J C McAuley, A McMahon, M McNarry, C Nolan, K O'Donnell, D Parekh, Pimm, J Sargent, L Sigfrid, M Steiner, D Stensel, A L Tan, J Whitney, D Wilkinson, D Wilson, M Witham, D G Wootton, T Yates

### **Renal**

D Thomas (*Lead*), N Brunskill (*Co-Lead*), S Francis (*Co-Lead*), S Greenwood (*Co-Lead*), C Laing (*Co-Lead*), K Bramham, P Chowdhury, A Frankel, L Lightstone, S McAdoo, K McCafferty, M Ostermann, N Selby, C Sharpe, M Willicombe

### **Local Clinical Centre PHOSP-COVID trial staff**

(listed in alphabetical order)

#### **Airedale NHS Foundation Trust**

A Shaw (PI), L Armstrong, B Hairsine, H Henson, C Kurasz, L Shenton

#### **Aneurin Bevan University Health Board**

S Fairbairn (PI), A Dell, N Hawkings, J Haworth, M Hoare, A Lucey, V Lewis, G Mallison, H Nassa, C Pennington, A Price, C Price, A Storrie, G Willis, S Young

#### **Barts Health NHS Trust & Queen Mary University of London**

P Pfeffer (PI), K Chong-James, C David, W Y James, A Martineau, O Zongo

#### **Barnsley Hospital NHS Foundation Trust**

A Sanderson (PI)

**Belfast Health and Social Care Trust & Queen's University Belfast**

L G Heaney (PI), C Armour, V Brown, T Craig, S Drain, B King, N Magee, D McAulay, E Major, L McGarvey, J McGinness, R Stone

**Betsi Cadwaladr University Health Board**

A Haggart (PI), A Bolger, F Davies, J Lewis, A Lloyd, R Manley, E McIvor, D Menzies, K Roberts, W Saxon, D Southern, C Subbe, V Whitehead

**Borders General Hospital, NHS Borders**

H El-Taweel (PI), J Dawson, L Robinson

**Bradford Teaching Hospitals NHS Foundation Trust**

D Saralaya (PI), L Brear, K Regan, K Storton

**Cambridge University Hospitals NHS Foundation Trust, NIHR Cambridge Clinical Research Facility & University of Cambridge**

J Fuld (PI), A Bermperi, I Cruz, K Dempsey, A Elmer, H Jones, S Jose, S Marciniak, M Parkes, C Ribeiro, J Taylor, M Toshner, L Watson, J Worsley

**Cardiff and Vale University Health Board**

R Sabit (PI), L Broad, A Buttress, T Evans, M Haynes, L Jones, L Knibbs, A McQueen, C Oliver, K Paradowski, J Williams

**Chesterfield Royal Hospital NHS Trust**

E Harris (PI), C Sampson

**Cwm Taf Morgannwg University Health Board**

C Lynch (PI), E Davies, C Evenden, A Hancock, K Hancock, M Rees, L Roche, N Stroud, T Thomas-Woods

**East Cheshire NHS Trust**

M Babores (PI), J Bradley-Potts, M Holland, N Keenan, S Shashaa, H Wassall

**East Kent Hospitals University NHS Foundation Trust**

E Beranova (PI), H Weston (PI), T Cosier, L Austin, J Deery, T Hazelton, C Price, H Ramos, R Solly, S Turney

**Gateshead NHS Trust**

L Pearce (PI), W McCormack, S Pugmire, W Stoker, A Wilson

### **Guy's and St Thomas' NHS Foundation Trust**

N Hart (PI), LA Aguilar Jimenez, G Arbane, S Betts, K Bisnauthsing, A Dewar, P Chowdhury, A Dewar, G Kaltsakas, H Kerslake, MM Magtoto, P Marino, LM Martinez, M Ostermann, J Rossdale, TS Solano, E Wynn

### **Hampshire Hospitals NHS Foundation Trust**

N Williams (PI), W Storrar (PI), M Alvarez Corral, A Arias, E Bevan, D Griffin, J Martin, J Owen,  
S Payne, A Prabhu, A Reed, C Wrey Brown

### **Harrogate and District NHD Foundation Trust**

C Lawson (PI), T Burdett, J Featherstone, A Layton, C Mills, L Stephenson,

### **Hull University Teaching Hospitals NHS Trust & University of Hull**

N Easom (PI), P Atkin, K Brindle, M G Crooks, K Drury, R Flockton, L Holdsworth, A Richards, D L Sykes, S Thackray-Nocera, C Wright

### **Hywel Dda University Health Board**

K E Lewis (PI), A Mohamed (PI), G Ross (PI), S Coetzee, K Davies, R Hughes, R Loosley, L O'Brien, Z Omar,  
H McGuinness, E Perkins, J Phipps, A Taylor, H Tench, R Wolf-Roberts

### **Imperial College Healthcare NHS Trust & Imperial College London**

L S Howard (PI), O Kon (PI), D C Thomas (PI), S Anifowose, L Burden, E Calvelo, B Card, C Carr, E R Chilvers,  
D Copeland, P Cullinan, P Daly, L Evison, T Fayzan, H Gordon, S Haq, R G Jenkins, C King, K March, M  
Mariveles, L McLeavey, N Mohamed, S Moriera, U Munawar, J Nunag, U Nwanguma, L Orriss- Dib, A Ross,  
M Roy, E Russell, K Samuel, J Schronce, N Simpson, L Tarusan, C Wood, N Yasmin

### **Kettering General Hospital NHS Trust**

R Reddy (PI), A-M, Guerdetta, M Hewitt, K Warwick, S White

### **King's College Hospital NHS Foundation Trust & Kings College London**

A M Shah (PI), C J Jolley (PI), O Adeyemi, R Adrego, H Assefa-Kebede, J Breeze, M Brown, S Byrne, T Chalder,  
P Dulawan, N Hart, A Hayday, A Hoare, A Knighton, M Malim, S Patale, I Peralta, N Powell, A Ramos, K  
Shevket, F Speranza, A Te

### **Leeds Teaching Hospitals & University of Leeds**

P Beirne (PI), A Ashworth, J Clarke, C Coupland, M Dalton, E Wade, C Favager, J Greenwood, J Glossop, L Hall, T Hardy, A Humphries, J Murira, D Peckham, S Plein, J Rangeley, G Saalmink, A L Tan, B Whittam, N Window, J Woods,

**Lewisham & Greenwich NHS Trust**

G Coakley (PI)

**Liverpool University Hospitals NHS Foundation Trust & University of Liverpool**

D G Wootton (PI), L Turtle (PI), L Allerton, AM All, M Beadsworth, A Berridge, J Brown, S Cooper, A Cross, S Defres, S L Dobson, J Earley, N French, W Greenhalf, H E Hardwick, K Hainey, J Hawkes, V Highett, S Kaprowska, AL Key, L Lavelle-Langham, N Lewis-Burke, G Madzamba, F Malein, S Marsh, C Mears, L Melling, M J Noonan, L Poll, J Pratt, E Richardson, A Rowe, M G Semple, V Shaw, K A Tripp, L O Wajero, S A Williams-Howard, J Wyles,

**London North West University Healthcare NHS Trust**

S N Diwanji (PI), P Papineni (PI), S Gurrarn, S Quaid, G F Tiongson, E Watson

**Manchester University NHS Foundation Trust & University of Manchester**

B Al-Sheklly (PI), A Horsley (PI), C Avram, J Blaikely, M Buch, N Choudhury, D Faluyi, T Felton, T Gorsuch, N A Hanley, T Hussell, Z Kausar, N Odell, R Osbourne, K Piper Hanley, K Radhakrishnan, S Stockdale

**Newcastle upon Tyne Hospitals NHS Foundation Trust & University of Newcastle**

A De Soyza (PI), C Echevarria (PI), A Ayoub, J Brown, G Burns, G Davies, H Fisher, C Francis, A Greenhalgh, P Hogarth, J Hughes, K Jiwa, G Jones, G MacGowan, D Price, A Sayer, J Simpson, H Tedd, S Thomas, S West, M Witham, S Wright, A Young

**NHS Dumfries and Galloway**

M J McMahon (PI), P Neill

**NHS Greater Glasgow and Clyde Health Board & University of Glasgow**

D Anderson (PI), H Bayes (PI), C Berry (PI), D Grieve (PI), I B McInnes (PI), N Basu, A Brown, A Dougherty, K Fallon, L Gilmour, K Mangion, A Morrow, K Scott, R Sykes

**NHS Highland**

E K Sage (PI), F Barrett, A Donaldson

**NHS Lanarkshire**

M Patel (PI), D Bell, A Brown, M Brown, R Hamil, K Leitch, L Macliver, J Quigley, A Smith, B Welsh

**NHS Lothian & University of Edinburgh**

G Choudhury (PI), J K Baillie, S Clohisey, A Deans, A B Docherty, J Furniss, E M Harrison, S Kelly, N I Lone, A Sheikh

**NHS Tayside & University of Dundee**

J D Chalmers (PI), D Connell, A Elliott, C Deas, J George, S Mohammed, J Rowland, A R Solstice, D Sutherland, C J Tee

**North Bristol NHS Trust & University of Bristol**

N Maskell (PI), D Arnold, S Barrett, H Adamali, A Dipper, S Dunn, A Morley, L Morrison, L Staddon, S Waterson, H Welch

**North Middlesex Hospital NHS Trust**

B Jayaraman (PI), T Light

**Nottingham University Hospitals NHS Trust & University of Nottingham**

C E Bolton (PI), P Almeida, J Bonnington, M Chrystal, C Dupont, P Greenhaff, A Gupta, L Howard, W Jang, S Linford, L Matthews, R Needham, A Nikolaidis, S Prosper, K Shaw, A K Thomas

**Oxford University Hospitals NHS Foundation Trust & University of Oxford**

L P Ho (PI), N M Rahman (PI), M Ainsworth, A Alamoudi, A Bates, A Bloss, A Burns, P Carter, J Chen, F Conneh, T Dong, R I Evans, E Fraser, X Fu, J R Geddes, F Gleeson, P Harrison, M Havinden-Williams, P Jezzard, N Kanellakis, I Koychev, P Kurupati, X Li, H McShane, C Megson, K Motohashi, S Neubauer, D Nicoll, G Ogg, E Pacpaco, M Pavlides, Y Peng, N Petousi, N Rahman, B Raman, M J Rowland, K Saunders, M Sharpe, N Talbot, E Tunnicliffe

**Royal Brompton and Harefield Clinical Group, Guy's and St Thomas' NHS Foundation Trust.**

W D-C Man (PI), B Patel (PI), R E Barker, D Cristiano, N Dormand, M Gummadi, S Kon, K Liyanage, C M Nolan, S Patel, O Polgar, P Shah, S J Singh, J A Walsh

**Royal Free London NHS Foundation Trust**

J Hurst (PI), H Jarvis (PI), S Mandal (PI), S Ahmad, S Brill, L Lim, D Matila, O Olaosebikan, C Singh

**Royal Papworth Hospital NHS Foundation Trust**

M Toshner (PI), H Baxendale, L Garner, C Johnson, J Mackie, A Michael, J Pack, K Paques, H Parfrey, J Parmar

**Salford Royal NHS Foundation Trust**

N Diar Bakerly (PI), P Dark, D Evans, E Hardy, A Harvey, D Holgate, S Knight, N Mairs, N Majeed, L McMorrow, J Oxtan, J Pendlebury, C Summersgill, R Ugwuoke, S Whittaker

**Salisbury NHS Foundation Trust**

W Matimba-Mupaya (PI), S Strong-Sheldrake

**Sheffield Teaching NHS Foundation Trust & University of Sheffield**

S L Rowland-Jones (PI), A A R Thompson (Co PI), J Bagshaw, M Begum, K Birchall, R Butcher, H Carborn, F Chan, K Chapman, Y Cheng, L Chetham, C Clark, Z Coburn, J Cole, M Dixon, A Fairman, J Finnigan, H Foot, D Foote, A Ford, R Gregory, K Harrington, L Haslam, L Hesselden, J Hockridge, A Holbourn, B Holroyd-Hind, L Holt, A Howell, E Hurditch, F Ilyas, C Jarman, A Lawrie, E Lee, J-H Lee, R Lenagh, A Lye, I Macharia, M Marshall, A Mbuyisa, J McNeill, S Megson, J Meiring, L Milner, S Misra, H Newell, T Newman, C Norman, L Nwafor, D Pattenadk, M Plowright, J Porter, P Ravencroft, C Roddis, J Rodger, P Saunders, J Sidebottom, J Smith, L Smith, N Steele, G Stephens, R Stimpson, B Thamu, N Tinker, K Turner, H Turton, P Wade, S Walker, J Watson, I Wilson, A Zawia

**St George's University Hospitals NHS Foundation Trust**

R Aul (PI), M Ali, A Dunleavy (PI), D Forton, N Msimanga, M Mencias, T Samakomva, S Siddique, J Teixeira, V Tavoukjian

**Sherwood Forest Hospitals NHS Foundation Trust**

J Hutchinson (PI), L Allsop, K Bennett, P Buckley, M Flynn, M Gill, C Goodwin, M Greatorex, H Gregory, C Heeley, L Holloway, M Holmes, J Kirk, W Lovegrove, TA Sewell, S Shelton, D Sissons, K Slack, S Smith, D Sowter, S Turner, V Whitworth, I Wynter

**Shropshire Community Health NHS Trust**

L Warburton (PI), S Painter, J Tomlinson

**Somerset NHS Foundation Trust**

C Vickers (PI), T Wainwright, D Redwood, J Tilley, S Palmer



**Swansea Bay University Health Board**

G A Davies (PI), L Connor, A Cook, T Rees, F Thaivalappil, C Thomas

**Tameside and Glossop Integrated Care NHS Foundation**

A Butt (PI), M Coulding, H Jones, S Kilroy, J McCormick, J McIntosh, H Savill, V Turner, J Vere

**The Great Western Hospital Foundation Trust**

E Fraile (PI), J Ugoji

**The Hillingdon Hospitals NHS Foundation Trust**

S S Kon (PI), H Lota, G Landers, M Nasser, S Portukhay

**The Rotherham NHS Foundation Trust**

A Hormis (PI), A Daniels, J Ingham, L Zeidan

**United Lincolnshire Hospitals NHS Trust**

M Chablani (PI), L Osborne

**University College London Hospital & University College London**

M Marks (PI), J S Brown (PI), N Ahwireng, B Bang, D Basire, R C Chambers, A Checkley, R Evans, M Heightman, T Hillman, J Hurst, J Jacob, S Janes, R Jastrub, M Lipman, S Logan, D Lomas, M Merida Morillas, H Plant, J C Porter, K Roy, E Wall

**University Hospital Birmingham NHS Foundation Trust & University of Birmingham**

D Parekh (PI), N Ahmad Haider, C Atkin, R Baggott, M Bates, A Botkai, A Casey, B Cooper, J Dasgin, K Draxlbauer, N Gautam, J Hazeldine, T Hiwot, S Holden, K Isaacs, T Jackson, S Johnson, V Kamwa, D Lewis, J M Lord, S Madathil, C McGhee, K Mcgee, A Neal, A Newton Cox, J Nyaboko, D Parekh, Z Peterkin, H Qureshi, L Ratcliffe, E Sapey, J Short, T Soulsby, J Stockley, Z Suleiman, T Thompson, M Ventura, S Walder, C Welch, D Wilson, S Yasmin, K P Yip

**University Hospitals of Derby and Burton**

P Beckett (PI) C Dickens, U Nanda

**University Hospitals of Leicester NHS Trust & University of Leicester**

C E Brightling (CI), R A Evans (PI), M Aljarroof, N Armstrong, H Arnold, H Aung, M Bakali, M Bakau, M Baldwin, M Bingham, M Bourne, C Bourne, N Brunskill, P Cairns, L Carr, A Charalambou, C Christie, M J

Davies, S Diver, S Edwards, C Edwardson, O Elneima, H Evans, J Finch, S Glover, N Goodman, B Gootpu, N J Greening, K Hadley, P Haldar, B Hargadon, V C Harris, L Houchen-Wolloff, W Ibrahim, L Ingram, K Khunti, A Lea, D Lee, G P McCann, H J C McAuley, P McCourt, T McNally, A Moss, W Monteiro, M Pareek, S Parker, A Rowland, A Prickett, I N Qureshi, R Russell, M Sereno, A Shikotra, S Siddiqui, A Singapuri, S J Singh, J Skeemer, M Soares, E Stringer, T Thornton, M Tobin, L V Wain, T J C Ward, F Woodhead, T Yates, A Yousuf

**University Hospital Southampton NHS Foundation Trust & University of Southampton**

M G Jones (PI), C Childs, R Djukanovic, S Fletcher, M Harvey, E Marouzet, B Marshall, R Samuel, T Sass, T Wallis, H Wheeler

**Whittington Health NHS**

R Dharmagunawardena (PI), E Bright, P Crisp, M Stern

**Wirral University Teaching Hospital**

A Wight (PI), L Bailey, A Reddington

**Wrightington Wigan and Leigh NHS trust**

A Ashish (PI), J Cooper, E Robinson

**Yeovil District Hospital NHS Foundation Trust**

A Broadley (PI)

**York & Scarborough NHS Foundation Trust**

K Howard (PI), L Barman, C Brookes, K Elliott, L Griffiths, Z Guy, D Ionita, H Redfearn, C Sarginson  
A Turnbull

**Health and Care Research Wales**

Y Ellis

**London School of Hygiene & Tropical Medicine (LSHTM)**

M Marks, A Briggs

**NIHR Office for Clinical Research Infrastructure**

K Holmes

**Patient Public Involvement Leads**

Asthma UK and British Lung Foundation Partnership - K Poinasamy, S Walker

**Royal Surrey NHS Foundation Trust**

M Halling-Brown

**South London and Maudsley NHS Foundation Trust & Kings College London**

G Breen, M Hotopf

**Swansea University & Swansea Welsh Network**

K Lewis, N Williams

## Supplementary methods

### Variables used in the analyses

Here we provide details on how the different variables used in the analyses were measured and encoded.

The following variables were used as markers of COVID-19 severity:

- WHO score: this is a scale defined by the WHO to capture the level of respiratory support needed by patients with COVID-19. It consists of 4 levels: no oxygen required (level 0), supplemental oxygen required (level 1), ventilation required (level 2, which we captured based on either continuous positive airway pressure ventilation, bi-level non-invasive ventilation or high-flow nasal oxygen needed at any point during hospital admission), and lastly invasive ventilation/oxygenation required (level 3, which was captured as either invasive mechanical ventilation or extra-corporeal membrane oxygenation). This was encoded as a continuous variable.
- National Early Warning Scores (NEWS): This scale captures the degree of departure of physical observations (a.k.a. vitals) from their normal range and is used nationally in the National Health Service (NHS) in the UK. It is a score ranging from 0 to 20 which we encoded as a continuous variable. Specifically, the following scoring is applied for the different physical observations and the total score is obtained by summing up the scores for the different items:
  - Respiratory Rate [breaths/min]:  $\leq 8$  (+2 points), 9-11 (+1 point), 12-20 (0 points), 21-21 (+2 points),  $\geq 25$  (+ 3 points);
  - Oxygen saturations:  $\leq 91\%$  (+3 points), 92-93% (+2 points), 94-95% (+1 point),  $\geq 96\%$  (+0 points);
  - Any supplemental oxygen: No (+0 points), Yes (+2 points);

- Temperature:  $\leq 35^{\circ}\text{C}$  (+3 points),  $35.1\text{-}36^{\circ}\text{C}$  (+1 point),  $36.1\text{-}38^{\circ}\text{C}$  (+0 points),  $38.1\text{-}39^{\circ}\text{C}$  (+1 point),  $\geq 39.1^{\circ}\text{C}$  (+2 points);
  - Systolic Blood Pressure [mmHg]:  $\leq 90$  (+3 points),  $91\text{-}100$  (+2 points),  $101\text{-}110$  (+1 point),  $111\text{-}219$  (+0 points),  $\geq 220$  (+3 points);
  - Heart Rate [beats per minute]:  $\leq 40$  (+3 points),  $41\text{-}50$  (+1 point),  $51\text{-}90$  (+0 points),  $91\text{-}110$  (+1 point),  $111\text{-}130$  (+2 points),  $\geq 131$  (+3 points).
- Recovery clusters: identified in a previous study based on the PHOSP cohort with clusters calculated using patient symptom questionnaires, physical performance, and cognitive assessment data.<sup>1</sup> The four resulting clusters, stratifying patients in terms of the severity of their recovery and the level of subsequent impairment, were categorised as follows:
    - Mild impairment;
    - Moderate impairment with cognitive impairment;
    - Severe impairment;
    - Very severe impairment.

Recovery cluster variable was encoded categorically with mild impairment used as a reference level.

- Duration of hospital admission: captured from the participant's health record and recorded as a continuous variable
- Diagnosis of pulmonary embolism during hospitalisation: captured from the participant's health record and recorded as a continuous variable
- Admission to intensive care: captured from the participant's health record and recorded as a continuous variable
- Presence of altered consciousness or confusion during admission: captured from the participant's health record and recorded as a continuous variable

The neuropsychiatric outcomes used were the total Montreal Cognitive Assessment (MoCA), the Patient Health Questionnaire (PHQ-9), the Generalized Anxiety Disorder scale (GAD-7), and a cognitive subset of the Patient Symptom Questionnaire (PSQ). The latter is a score ranging from 0 to 7 which we encoded as a continuous variable. The latter was defined as the sum of the following items from PSQ:

- Within the last seven days, have you had any of these symptoms...?
  - Confusion (Yes: +1 point, No: 0 point)
  - Short term memory loss (Yes: +1 point, No: 0 point)
  - Difficulty with concentration (Yes: +1 point, No: 0 point)
  - Difficulty with communication (Yes: +1 point, No: 0 point)
  - Slowing down in your thinking (Yes: +1 point, No: 0 point)
- Do you have difficulty remembering or concentrating?:
  - No: 0 points
  - Yes, some difficulty: + 1/3 point
  - Yes, a lot of difficulty: + 2/3 points
  - Yes, cannot do at all: +1 point
- Do you have difficulty communicating, for example understanding or being understood?
  - No: 0 points
  - Yes, some difficulty: + 1/3 point
  - Yes, a lot of difficulty: + 2/3 points
  - Yes, cannot do at all: +1 point

The different covariates used in the analysis and their measurement were as follows:

- Diagnoses of respiratory condition
- Diagnosis of a rheumatological condition
- Diagnosis of cardiovascular condition
- Diagnosis of gastrointestinal condition
- History of a cerebrovascular accident
- Diagnosis of dementia
- Diagnosis of Parkinson's disease
- Diagnosis of depression or anxiety
- Diagnosis of another chronic condition, specifically chronic fatigue syndrome or chronic pain
- Diagnosis of diabetes
- Diagnosis of hypothyroidism/hyperthyroidism or other chronic metabolic/endocrine disorder
- Diagnosis of chronic kidney disease
- History of cancer
- History of chronic infectious diseases
- Educational level (highest level completed): encoded as a categorical variable with the following 8 categories:
  - None
  - Primary School
  - Secondary School (GCSE level, NVQ level ½ or equivalent, typically at the age of 16)
  - Sixth form college (A-levels, NVQ level 3 or equivalent, typically at the age of 18)
  - Vocational qualification (NVQ level 4 or equivalent)

- Undergraduate university degree or NVQ level 5 or equivalent
- Post-graduate qualification
- Prefer not to say
- Annual Household Income: encoded as a categorical variable with the following categories:
  - < £19,000
  - £19,001- £26,000
  - £26,001-£35,000
  - £35,001-£48,000
  - >£48,001
  - Prefer not to say
- Marital status: encoded with a single binary variable (married vs. not)
- Whether English was a patient's first language, as reported by the patient and encoded as a binary variable.

### **Details on statistical and robustness analyses**

In this paper, we addressed two objectives:

- Objective 1: seeking association between markers of nervous system injury and post-acute neuropsychiatric outcomes
- Objective 2: seeking associations between markers of severity of the acute COVID-19 illness and markers of nervous system injury

In the primary analysis, only complete data was used (any participant with missing data on any of the exposure, outcome, or covariate data was discarded) and 3x8 separate regression models were estimated for Objective 1 (one for each marker of nervous system injury and



each neuropsychiatric outcome) and 7x3 separate regression models were estimated for Objective 2 (one for each marker of COVID-19 severity and each marker of nervous system injury, where each model returned one coefficient except for the model related to recovery clusters which returned 3 coefficients, one for each level of the categorical variable).

For both Objectives 1 and 2, we then ran 2 robustness analysis:

- 1) Using a single model incorporating all independent variables: for Objective 1, this meant that all three markers of nervous system injury were incorporated as independent variable in the regression model and only 8 separate regressions (rather than 24) were estimated (one for each neuropsychiatric outcome). For Objective 2, this meant that all seven markers of COVID-19 severity were incorporated as independent variables in the regression model and only three separate regressions (rather than 21) were estimated (one for each marker of nervous system injury).
- 2) Imputing missing data: Missing data on markers of COVID-19 severity, post-acute neuropsychiatric outcomes (i.e. GAD-7, PHQ-9, MoCA, and C-PSQ) or confounders were imputed (markers of nervous system injury were not imputed and only participants with complete data on these biomarkers were included). Variables used to predict aforementioned missing data were demographics, COVID-19 severity markers and markers of nervous system injury. The imputation was achieved using multiple imputation by chain equation model with 20 chains and 5 iterations, using the mice package (version 3.14.0). To maximise the information available in the imputation, the whole PHOSP-COVID cohort (not just those with markers of nervous system injury) was used to impute the missing data.

## Supplementary figures

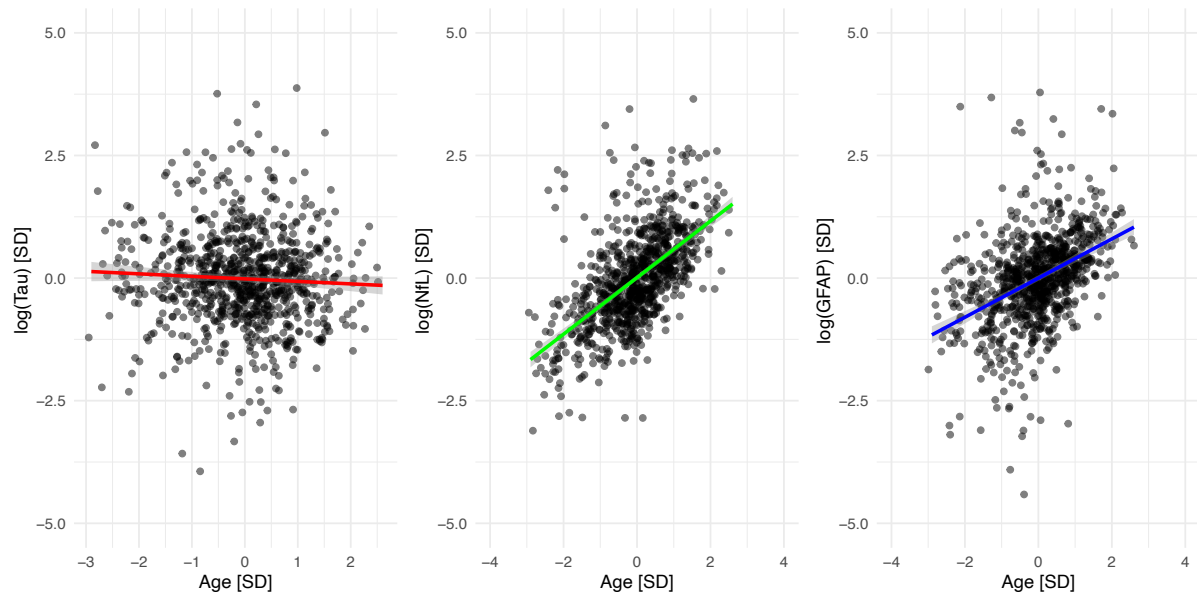

**Supplementary Figure 1:** Distributions of standardised markers of nervous system injury in logarithmic scale as functions of standardised age at hospitalisation admission. Pearson's correlation with standardised age is as follows;  $r$  (p-value): log(Tau)  $r = -0.05$  (0.13); log(NfL)  $r = 0.57$  ( $< 0.001$ ); log(GFAP)  $r = 0.38$  ( $< 0.001$ ).

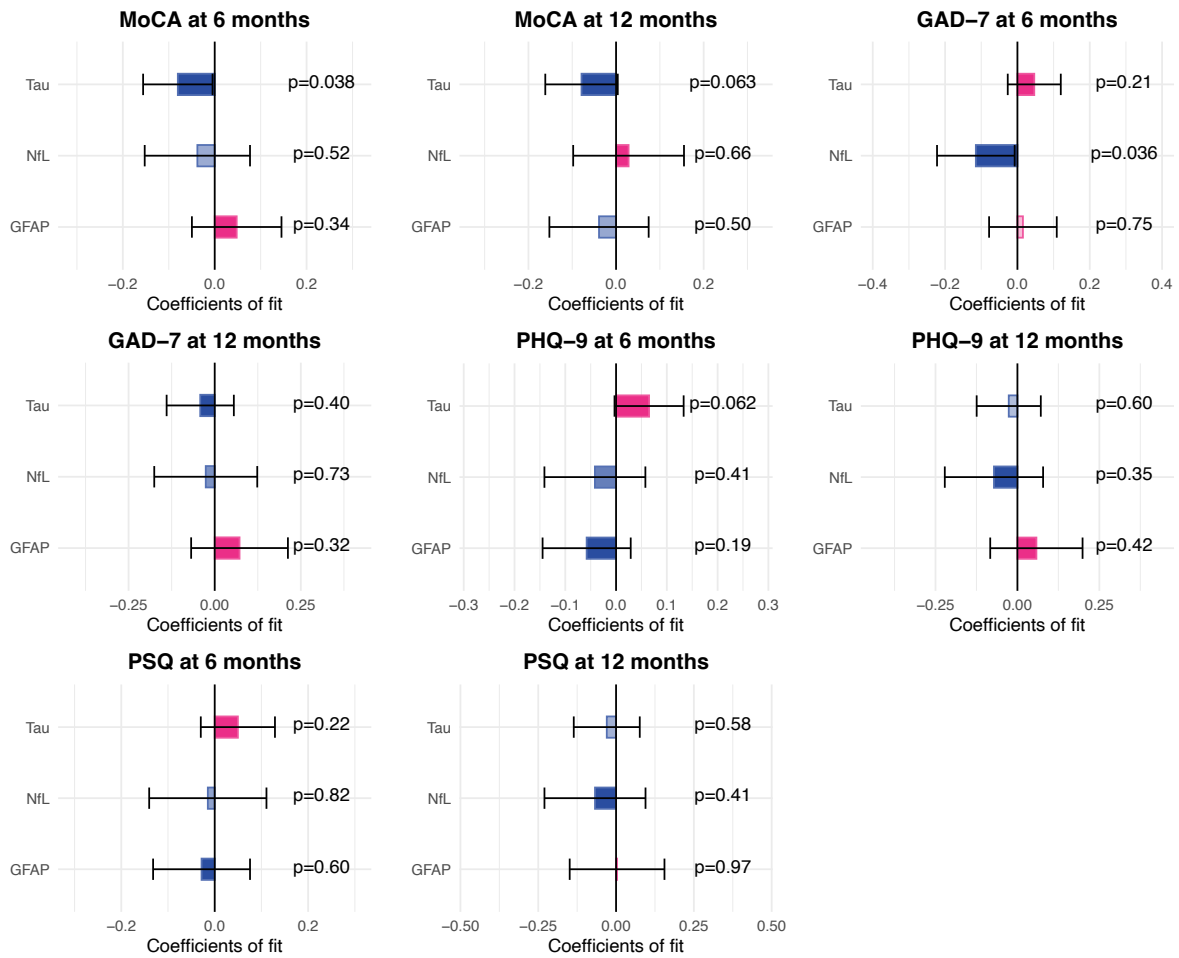

**Supplementary Figure 2:** Same as Figure 1 of the main manuscript but based on a model wherein all three markers of nervous system injury are included as independent variables in a single regression model. Uncorrected p-values are reported next to each bar and Bonferroni-corrected p-values meeting statistical significance thresholds are flagged as follows: \* <math><0.05</math>, \*\*<math><0.01</math>, \*\*\*<math><0.001</math>

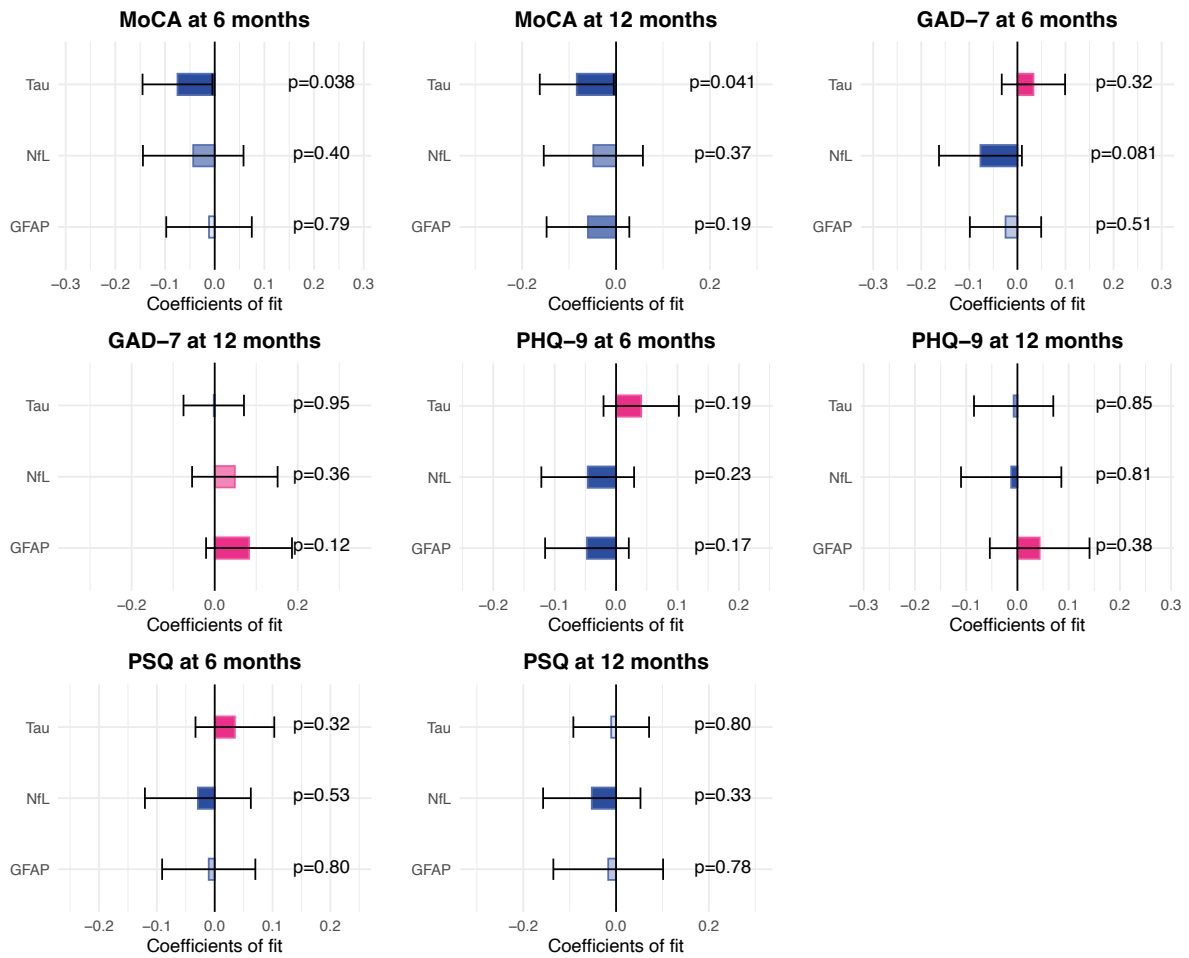

**Supplementary Figure 3:** Same as Figure 1 of the main manuscript but based on a dataset wherein missing data for covariates were imputed using multiple imputations and results pooled across imputations using Rubin's rule. Uncorrected p-values are reported next to each bar and Bonferroni-corrected p-values meeting statistical significance thresholds are flagged as follows: \* <math><0.05</math>, \*\*<math><0.01</math>, \*\*\*<math><0.001</math>

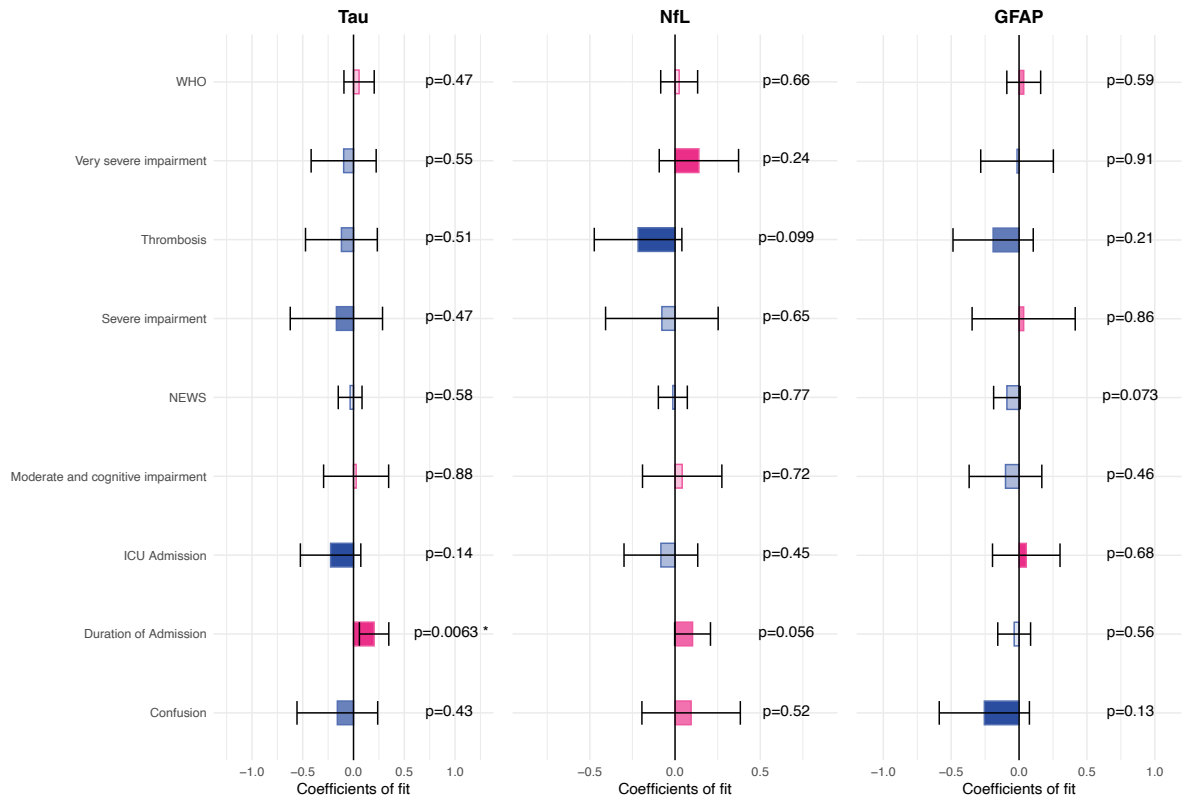

**Supplementary Figure 4:** Same as Figure 2 of the main manuscript but based on a model wherein all markers of severity of the acute COVID-19 illness are included as independent variables in a single regression model. Uncorrected p-values are reported next to each bar and Bonferroni-corrected p-values meeting statistical significance thresholds are flagged as follows: \* <math><0.05</math>, \*\*<math><0.01</math>, \*\*\*<math><0.001</math>

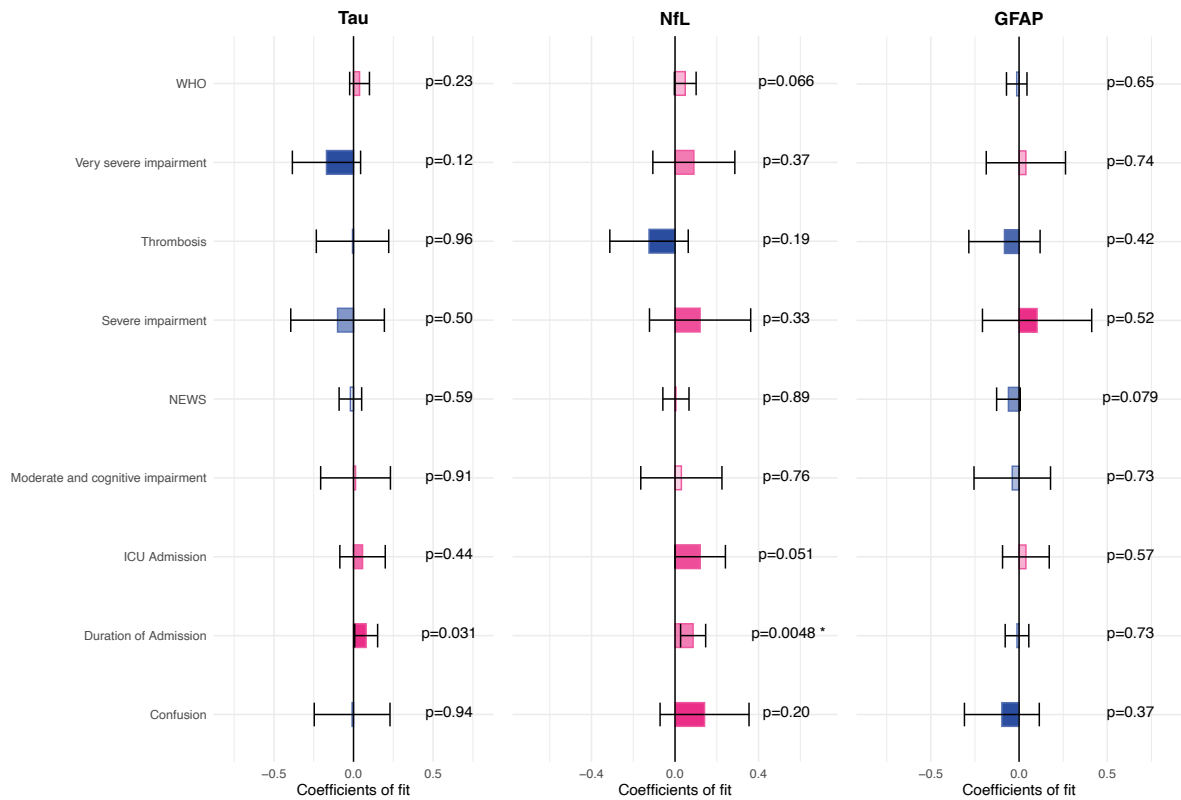

**Supplementary Figure 5:** Same as Figure 2 of the main manuscript but based on a dataset wherein missing data for covariates were imputed using multiple imputations and results pooled across imputations using Rubin’s rule. Uncorrected p-values are reported next to each bar and Bonferroni-corrected p-values meeting statistical significance thresholds are flagged as follows: \* <math><0.05</math>, \*\*<math><0.01</math>, \*\*\*<math><0.001</math>

## Supplementary tables

**Supplementary Table 1.** Baseline characteristics for the cohort used in this study and for all other PHOSP-COVID participants.

| <b>Cohort</b>                   | <b>PHOSP-COVID participants with<br/>neural injury markers</b> | <b>All other PHOSP-COVID<br/>participants</b> |
|---------------------------------|----------------------------------------------------------------|-----------------------------------------------|
| COHORT SIZE                     | 891                                                            | 1806                                          |
| SOCIODEMOGRAPHIC FACTORS        |                                                                |                                               |
| Age; mean (SD)                  | 57.3 (12.5)                                                    | 58.2 (12.8)                                   |
| Sex; n (%)                      |                                                                |                                               |
| Female                          | 312 (35.0)                                                     | 637 (35.3)                                    |
| Male                            | 535 (60.0)                                                     | 958 (53.0)                                    |
| Unknown                         | 44 (4.9)                                                       | 211 (11.7)                                    |
| Race; n (%)                     |                                                                |                                               |
| White                           | 668 (75.0)                                                     | 1199 (66.4)                                   |
| Asian                           | 122 (13.7)                                                     | 188 (10.4)                                    |
| Black                           | 47 (5.3)                                                       | 130 (7.2)                                     |
| Mixed                           | 14 (1.6)                                                       | 37 (2.0)                                      |
| Other                           | 24 (2.7)                                                       | 75 (4.2)                                      |
| Unknown                         | 16 (1.8)                                                       | 177 (9.8)                                     |
| Educational level; n (%)        |                                                                |                                               |
| Primary school                  | 16 (1.8)                                                       | 41 (2.3)                                      |
| Secondary school                | 271 (30.4)                                                     | 488 (27.0)                                    |
| Sixth form college              | 105 (11.8)                                                     | 212 (11.7)                                    |
| Vocational Qualification        | 97 (10.9)                                                      | 192 (10.6)                                    |
| Undergraduate university degree | 157 (17.6)                                                     | 279 (15.4)                                    |
| Post-graduate qualification     | 113 (12.7)                                                     | 232 (12.8)                                    |
| None                            | 23 (2.6)                                                       | 45 (2.5)                                      |
| Prefer not to say               | 29 (3.3)                                                       | 57 (3.2)                                      |
| Unknown                         | 80 (9.0)                                                       | 260 (14.4)                                    |
| Household income; n (%)         |                                                                |                                               |
| < £19,000                       | 104 (11.7)                                                     | 275 (15.2)                                    |
| £19,001 – £26,000               | 100 (11.2)                                                     | 195 (10.8)                                    |
| £26,001 – £35,000               | 104 (11.7)                                                     | 180 (10.0)                                    |

|                                    |            |             |
|------------------------------------|------------|-------------|
| £35,001 – £48,000                  | 105 (11.8) | 180 (10.0)  |
| >£48,001                           | 210 (23.6) | 366 (20.3)  |
| Prefer not to say                  | 189 (21.2) | 346 (19.2)  |
| Unknown                            | 79 (8.9)   | 264 (14.6)  |
| Marital status; n (%)              |            |             |
| Married                            | 500 (56.1) | 895 (49.6)  |
| Unmarried                          | 322 (36.1) | 662 (36.7)  |
| Unknown                            | 69 (7.7)   | 249 (13.8)  |
| English as a first language; n (%) |            |             |
| Yes                                | 691 (77.6) | 1298 (71.9) |
| No                                 | 135 (15.2) | 271 (15.0)  |
| Unknown                            | 65 (7.3)   | 237 (13.1)  |
| COMORBIDITIES; n (%)               |            |             |
| Cancer                             | 61 (6.8)   | 122 (6.8)   |
| Cardiovascular condition           | 372 (41.8) | 791 (43.8)  |
| ME/CFS/Fibromyalgia/Chronic pain   | 40 (4.5)   | 91 (5.0)    |
| Chronic kidney disease             | 33 (3.7)   | 73 (4.0)    |
| Cerebrovascular accident           | 33 (3.7)   | 70 (3.9)    |
| Dementia                           | < 10       | < 10        |
| Diabetes                           | 166 (18.6) | 351 (19.4)  |
| Metabolic/endocrine disorder       | 65 (7.3)   | 152 (8.4)   |
| Gastrointestinal condition         | 179 (20.1) | 371 (20.5)  |
| Infectious disease                 | 21 (2.4)   | 49 (2.7)    |
| Parkinson's disease                | < 10       | < 10        |
| Depression or anxiety              | 151 (16.9) | 308 (17.1)  |
| Respiratory condition              | 254 (28.5) | 457 (25.3)  |
| Rheumatological condition          | 121 (13.6) | 273 (15.1)  |



**Supplementary Table 2:** Baseline characteristics of the cohort with a 12-month follow-up

| <b>Cohort</b>                      |             |
|------------------------------------|-------------|
| COHORT SIZE                        | 507         |
| SOCIODEMOGRAPHIC FACTORS           |             |
| Age; mean (SD)                     | 58.8 (12.0) |
| Sex; n (%)                         |             |
| Female                             | 170 (33.5)  |
| Male                               | 320 (63.1)  |
| Unknown                            | 17 (3.4)    |
| Ethnicity; n (%)                   |             |
| White                              | 396 (78.1)  |
| Asian                              | 66 (13.0)   |
| Black                              | 22 (4.3)    |
| Mixed                              | 8 (1.6)     |
| Other                              | 12 (2.4)    |
| Unknown                            | 3 (0.6)     |
| Educational level; n (%)           |             |
| Primary school                     | 6 (1.2)     |
| Secondary school                   | 154 (30.4)  |
| Sixth form college                 | 61 (12.0)   |
| Vocational qualification           | 61 (12.0)   |
| Undergraduate university degree    | 92 (18.1)   |
| Post-graduate qualification        | 67 (13.2)   |
| None                               | 15 (3.0)    |
| Prefer not to say                  | 13 (2.6)    |
| Unknown                            | 38 (7.5)    |
| Household income; n (%)            |             |
| < £19,000                          | 58 (11.4)   |
| £19,001 – £26,000                  | 57 (11.2)   |
| £26,001 – £35,000                  | 66 (13.0)   |
| £35,001 – £48,000                  | 60 (11.8)   |
| >£48,001                           | 118 (23.3)  |
| Prefer not to say                  | 112 (22.1)  |
| Unknown                            | 36 (7.1)    |
| Marital status; n (%)              |             |
| Married                            | 298 (58.8)  |
| Unmarried                          | 179 (35.3)  |
| Unknown                            | 30 (5.9)    |
| English as a first language; n (%) |             |
| Yes                                | 407 (80.3)  |
| No                                 | 75 (14.8)   |
| Unknown                            | 25 (4.9)    |
| COMORBIDITIES; n (%)               |             |
| Cancer                             | 34 (6.7)    |
| Cardiovascular condition           | 230 (45.4)  |
| ME/CFS/Fibromyalgia/Chronic pain   | 22 (4.3)    |
| Chronic kidney disease             | 17 (3.4)    |

|                                           |             |
|-------------------------------------------|-------------|
| Cerebrovascular accident                  | 21 (4.1)    |
| Dementia                                  | < 10        |
| Diabetes                                  | 107 (21.1)  |
| Metabolic/endocrine disorder              | 40 (7.9)    |
| Gastrointestinal condition                | 98 (19.3)   |
| Infectious disease                        | 11 (2.2)    |
| Parkinson's disease                       | < 10        |
| Depression or anxiety                     | 83 (16.4)   |
| Respiratory condition                     | 143 (28.2)  |
| Rheumatological condition                 | 63 (12.4)   |
| COVID-19 SEVERITY MARKERS                 |             |
| WHO; mean (SD)                            | 2.53 (1.09) |
| NEWS; mean (SD)                           | 3.76 (2.44) |
| Duration of hospital admission; mean (SD) | 16.5 (20.9) |
| Pulmonary embolism; n (%)                 | 52 (10.3)   |
| Altered consciousness/confusion; n (%)    | 48 (9.5)    |
| COVID-19 Recovery clusters; n (%)         |             |
| Mild impairment                           | 69 (13.6)   |
| Moderate and cognitive impairment         | 111 (21.9)  |
| Severe impairment                         | 49 (9.7)    |
| Very severe impairment                    | 177 (34.9)  |
| Unknown                                   | 101 (19.9)  |
| CLINICAL SCALES AT 6 MONTHS; mean (SD)    |             |
| MoCA                                      | 26.4 (3.21) |
| GAD-7                                     | 5.02 (5.83) |
| PHQ-9                                     | 6.34 (6.62) |
| PSQ                                       | 2.05 (2.11) |
| NEURAL INJURY MARKERS; mean (SD)          |             |
| GFAP                                      | 4.30 (0.85) |
| Tau protein                               | 1.72 (0.79) |
| NfL                                       | 2.29 (0.69) |

**Supplementary Table 3:** Regression coefficients and 95% confidence intervals for the variables (covariates and neural injury markers) used in the regression model wherein clinical scales measured at 6 months in each column are dependent variables.

|                                     | Dependent variables    |                         |                        |                        |
|-------------------------------------|------------------------|-------------------------|------------------------|------------------------|
|                                     | MoCA at 6 months       | GAD-7 at 6 months       | PHQ-9 at 6 months      | C-PSQ at 6 months      |
| <b>Covariates</b>                   |                        |                         |                        |                        |
| Cardiovascular condition            | 0.083 (-0.084 - 0.25)  | 0.22 (0.058 - 0.38)     | 0.16 (0.013 - 0.31)    | 0.05 (-0.13 - 0.23)    |
| Cerebrovascular accident            | -0.41 (-0.79 - -0.026) | -0.11 (-0.45 - 0.24)    | -0.029 (-0.35 - 0.29)  | 0.065 (-0.32 - 0.45)   |
| Dementia                            | 1.13 (-0.71 - 2.96)    | 0.55 (-1.31 - 2.41)     | 0.13 (-1.60 - 1.86)    | 0.71 (-1.16 - 2.59)    |
| Parkinson's disease                 | 0.31 (-1.47 - 2.09)    | 0.20 (-1.09 - 1.50)     | 0.62 (-0.58 - 1.82)    | -0.55 (-2.39 - 1.29)   |
| Depression or anxiety               | -0.12 (-0.33 - 0.084)  | 0.67 (0.47 - 0.87)      | 0.62 (0.44 - 0.81)     | 0.39 (0.17 - 0.61)     |
| ME/CFS/Fibromyalgia/Chronic pain    | -0.48 (-0.84 - -0.12)  | 0.66 (0.31 - 1.01)      | 0.57 (0.25 - 0.89)     | 0.49 (0.13 - 0.85)     |
| Diabetes                            | -0.14 (-0.33 - 0.053)  | 0.12 (-0.065 - 0.31)    | 0.058 (-0.12 - 0.23)   | 0.045 (-0.17 - 0.26)   |
| Respiratory condition               | -0.0093 (-0.17 - 0.15) | 0.14 (-0.019 - 0.29)    | 0.083 (-0.059 - 0.23)  | -0.0079 (-0.18 - 0.16) |
| Rheumatological condition           | 0.18 (-0.039 - 0.40)   | 0.094 (-0.12 - 0.30)    | 0.21 (0.012 - 0.40)    | 0.068 (-0.16 - 0.29)   |
| Gastrointestinal condition          | 0.012 (-0.17 - 0.19)   | 0.021 (-0.15 - 0.19)    | 0.089 (-0.072 - 0.25)  | -0.081 (-0.27 - 0.11)  |
| Metabolic/endocrine disorder        | -0.036 (-0.31 - 0.24)  | 0.04 (-0.22 - 0.30)     | -0.044 (-0.29 - 0.20)  | 0.14 (-0.14 - 0.41)    |
| Chronic kidney disease              | -0.13 (-0.50 - 0.24)   | -0.072 (-0.43 - 0.28)   | -0.013 (-0.34 - 0.32)  | 0.059 (-0.33 - 0.45)   |
| Cancer                              | -0.17 (-0.44 - 0.11)   | 0.17 (-0.10 - 0.44)     | 0.14 (-0.11 - 0.39)    | -0.076 (-0.33 - 0.45)  |
| Chronic infectious disease          | 0.11 (-0.40 - 0.62)    | -0.50 (-0.95 - -0.06)   | -0.26 (-0.67 - 0.15)   | -0.12 (-0.62 - 0.39)   |
| Age                                 | -0.22 (-0.33 - -0.12)  | -0.097 (-0.20 - 0.0021) | -0.14 (-0.23 - -0.049) | -0.10 (-0.21 - 0.013)  |
| Sex (female)                        | -0.06 (-0.22 - 0.097)  | 0.12 (-0.031 - 0.27)    | 0.16 (0.023 - 0.31)    | 0.055 (-0.12 - 0.23)   |
| Race (reference: White)             |                        |                         |                        |                        |
| Mixed                               | -0.40 (-1.01 - 0.21)   | 0.078 (-0.51 - 0.67)    | -0.29 (-0.84 - 0.26)   | -0.063 (-0.66 - 0.54)  |
| Asian                               | -0.064 (-0.34 - 0.21)  | -0.21 (-0.48 - 0.063)   | -0.15 (-0.40 - 0.094)  | -0.24 (-0.54 - 0.063)  |
| Black                               | -0.64 (-0.97 - -0.31)  | 0.012 (-0.32 - 0.34)    | -0.14 (-0.45 - 0.17)   | -0.18 (-0.57 - 0.21)   |
| Other                               | -0.17 (-0.67 - 0.34)   | -0.081 (-0.58 - 0.42)   | -0.0092 (-0.47 - 0.45) | -0.32 (-0.84 - 0.19)   |
| Educational level (reference: None) |                        |                         |                        |                        |
| Primary school                      | -0.67 (-1.37 - 0.027)  | -0.19 (-0.85 - 0.47)    | -0.36 (-0.97 - 0.26)   | -0.37 (-1.07 - 0.33)   |
| Secondary school                    | 0.50 (0.03 - 0.97)     | -0.16 (-0.62 - 0.31)    | -0.049 (-0.48 - 0.38)  | -0.03 (-0.55 - 0.49)   |
| Sixth form college                  | 0.65 (0.16 - 1.15)     | -0.11 (-0.61 - 0.38)    | -0.057 (-0.51 - 0.40)  | -0.083 (-0.63 - 0.46)  |
| Vocational qualification            | 0.71 (0.21 - 1.21)     | 0.017 (-0.47 - 0.51)    | 0.099 (-0.36 - 0.55)   | 0.24 (-0.30 - 0.46)    |
| Undergraduate university degree     | 0.65 (0.15 - 1.14)     | -0.18 (-0.67 - 0.30)    | -0.20 (-0.65 - 0.24)   | 0.10 (-0.43 - 0.64)    |
| Post-graduate qualification         | 0.99 (0.48 - 1.50)     | -0.26 (-0.76 - 0.24)    | -0.14 (-0.61 - 0.32)   | -0.008 (-0.57 - 0.55)  |
| Prefer not to say                   | 0.72 (0.13 - 1.31)     | 0.11 (-0.46 - 0.68)     | 0.10 (-0.42 - 0.63)    | 0.70 (0.048 - 1.36)    |
| Income (reference: < £19,000)       |                        |                         |                        |                        |
| £19,001 - £26,000                   | -0.024 (-0.32 - 0.27)  | -0.45 (-0.74 - -0.17)   | -0.53 (-0.79 - -0.26)  | -0.18 (-0.49 - 0.12)   |
| £26,001 - £35,000                   | 0.18 (-0.11 - 0.47)    | -0.66 (-0.94 - -0.39)   | -0.68 (-0.94 - -0.42)  | -0.39 (-0.69 - -0.087) |
| £35,001 - £48,000                   | 0.12 (-0.18 - 0.42)    | -0.44 (-0.73 - -0.15)   | -0.52 (-0.79 - -0.25)  | -0.38 (-0.71 - -0.06)  |
| >£48,001                            | 0.30 (0.022 - 0.57)    | -0.49 (-0.75 - -0.22)   | -0.56 (-0.80 - -0.31)  | -0.32 (-0.60 - -0.026) |

|                              |                         |                         |                        |                         |
|------------------------------|-------------------------|-------------------------|------------------------|-------------------------|
| Prefer not to say            | 0.12 (-0.14 - 0.37)     | -0.26 (-0.52 - -0.014)  | -0.41 (-0.64 - -0.17)  | -0.29 (-0.56 - -0.019)  |
| Is Married                   | 0.11 (-0.046 - 0.26)    | -0.15 (-0.30 - -0.0043) | -0.19 (-0.33 - -0.053) | -0.067 (-0.23 - 0.099)  |
| English as a first language  | 0.54 (0.27 - 0.81)      | -0.35 (-0.60 - -0.091)  | -0.064 (-0.30 - 0.17)  | 0.11 (-0.17 - 0.40)     |
| <b>Neural injury markers</b> |                         |                         |                        |                         |
| Tau                          | -0.08 (-0.16 - -0.0047) | 0.047 (-0.027 - 0.12)   | 0.065 (-0.0031 - 0.13) | 0.05 (-0.03 - 0.13)     |
| NfL                          | -0.038 (-0.15 - 0.077)  | -0.12 (-0.22 - -0.0076) | -0.042 (-0.14 - 0.058) | -0.015 (-0.14 - 0.11)   |
| GFAP                         | 0.048 (-0.05 - 0.15)    | 0.015 (-0.079 - 0.11)   | -0.058 (-0.15 - 0.029) | -0.028 (-0.13 - 0.0076) |

**Supplementary Table 4:** Regression coefficients and 95% confidence intervals for the variables (covariates and neural injury markers) used in the regression model wherein clinical scales measured at 12 months in each column are dependent variables.

|                                        | Dependent variables     |                        |                        |                        |
|----------------------------------------|-------------------------|------------------------|------------------------|------------------------|
|                                        | MoCA at 12 months       | GAD-7 at 12 months     | PHQ-9 at 12 months     | C-PSQ at 12 months     |
| <b>Covariates</b>                      |                         |                        |                        |                        |
| Cardiovascular condition               | 0.03 (-0.16 - 0.22)     | 0.25 (0.023 - 0.47)    | 0.13 (-0.096 - 0.36)   | 0.22 (-0.03 - 0.46)    |
| Cerebrovascular accident               | -0.17 (-0.55 - 0.21)    | -0.26 (-0.72 - 0.20)   | -0.13 (-0.60 - 0.35)   | 0.086 (-0.43 - 0.61)   |
| Dementia                               | 0.76 (-0.85 - 2.38)     | 1.21 (-0.75 - 3.18)    | 0.33 (-1.65 - 2.30)    | 0.67 (-1.37 - 2.71)    |
| Parkinson's disease                    | 0.42 (-0.68 - 1.51)     | 0.95 (-0.39 - 2.29)    | 0.36 (-0.98 - 1.70)    | 0.45 (-0.94 - 1.83)    |
| Depression or anxiety                  | -0.11 (-0.35 - 0.13)    | 0.65 (0.36 - 0.93)     | 0.64 (0.36 - 0.92)     | 0.54 (0.24 - 0.84)     |
| ME/CFS/Fibromyalgia/<br>Chronic pain   | -0.57 (-1.00 - -0.14)   | 0.63 (0.11 - 1.15)     | 0.68 (0.16 - 1.20)     | 0.84 (0.26 - 1.42)     |
| Diabetes                               | -0.29 (-0.50 - -0.079)  | 0.02 (-0.23 - 0.27)    | 0.067 (-0.19 - 0.32)   | 0.17 (-0.11 - 0.45)    |
| Respiratory condition                  | 0.10 (-0.073 - 0.28)    | -0.074 (-0.29 - 0.14)  | -0.08 (-0.29 - 0.13)   | -0.046 (-0.28 - 0.19)  |
| Rheumatological condition              | 0.00068 (-0.25 - 0.25)  | -0.036 (-0.34 - 0.27)  | 0.10 (-0.20 - 0.41)    | -0.058 (-0.38 - 0.26)  |
| Gastrointestinal condition             | 0.15 (-0.059 - 0.36)    | 0.067 (-0.19 - 0.32)   | 0.068 (-0.19 - 0.33)   | -0.092 (-0.37 - 0.18)  |
| Metabolic/endocrine<br>disorder        | -0.13 (-0.45 - 0.20)    | 0.03 (-0.33 - 0.39)    | 0.026 (-0.34 - 0.39)   | 0.051 (-0.36 - 0.46)   |
| Chronic kidney disease                 | 0.065 (-0.34 - 0.47)    | 0.15 (-0.35 - 0.64)    | -0.041 (-0.54 - 0.46)  | 0.055 (-0.50 - 0.61)   |
| Cancer                                 | 0.0057 (-0.32 - 0.33)   | 0.087 (-0.31 - 0.49)   | -0.06 (-0.46 - 0.34)   | 0.11 (-0.32 - 0.55)    |
| Chronic infectious disease             | -0.73 (-1.32 - -0.13)   | -0.086 (-0.69 - 0.51)  | -0.16 (-0.76 - 0.44)   | -0.069 (-0.69 - 0.55)  |
| Age                                    | -0.25 (-0.37 - -0.12)   | -0.21 (-0.36 - -0.068) | -0.17 (-0.32 - -0.024) | -0.18 (-0.34 - -0.016) |
| Sex (female)                           | 0.097 (-0.081 - 0.27)   | 0.15 (-0.061 - 0.35)   | 0.10 (-0.11 - 0.31)    | 0.032 (-0.20 - 0.26)   |
| Race (Reference: White)                |                         |                        |                        |                        |
| Mixed                                  | -1.30 (-2.08 - -0.52)   | 0.031 (-0.76 - 0.82)   | -0.20 (-0.99 - 0.59)   | 0.056 (-0.76 - 0.87)   |
| Asian                                  | -0.038 (-0.37 - 0.29)   | 0.21 (-0.16 - 0.58)    | 0.14 (-0.23 - 0.51)    | -0.12 (-0.53 - 0.29)   |
| Black                                  | -0.67 (-1.10 - -0.24)   | 0.087 (-0.42 - 0.59)   | -0.087 (-0.60 - 0.42)  | -0.24 (-0.75 - 0.27)   |
| Other                                  | 0.011 (-0.59 - 0.61)    | -0.016 (-0.68 - 0.65)  | -0.0099 (-0.68 - 0.66) | -0.14 (-0.90 - 0.61)   |
| Educational level<br>(reference: None) |                         |                        |                        |                        |
| Primary school                         | -0.93 (-1.86 - -0.0063) | -0.27 (-1.35 - 0.82)   | -0.38 (-1.47 - 0.71)   | -0.62 (-1.93 - 0.68)   |
| Secondary school                       | -0.0023 (-0.54 - 0.53)  | -0.0093 (-0.68 - 0.66) | 0.089 (-0.58 - 0.76)   | -0.20 (-1.09 - 0.69)   |
| Sixth form college                     | 0.14 (-0.42 - 0.71)     | -0.14 (-0.85 - 0.56)   | -0.074 (-0.78 - 0.63)  | -0.27 (-1.19 - 0.65)   |
| Vocational qualification               | 0.15 (-0.42 - 0.71)     | 0.007 (-0.70 - 0.71)   | 0.16 (-0.55 - 0.87)    | -0.047 (-0.97 - 0.87)  |
| Undergraduate university<br>degree     | 0.23 (-0.33 - 0.79)     | -0.14 (-0.84 - 0.57)   | 0.041 (-0.66 - 0.74)   | -0.15 (-1.07 - 0.76)   |
| Post-graduate<br>qualification         | 0.42 (-0.15 - 0.99)     | -0.24 (-0.96 - 0.48)   | -0.01 (-0.74 - 0.72)   | -0.30 (-1.22 - 0.63)   |
| Prefer not to say                      | -0.28 (-0.99 - 0.43)    | 0.16 (-0.68 - 0.99)    | 0.12 (-0.72 - 0.96)    | 0.15 (-0.89 - 1.18)    |
| Income (Reference: <<br>£19,000)       |                         |                        |                        |                        |
| £19,001 - £26,000                      | 0.36 (0.019 - 0.70)     | -0.31 (-0.71 - 0.094)  | -0.32 (-0.73 - 0.085)  | -0.24 (-0.70 - 0.23)   |
| £26,001 - £35,000                      | 0.52 (0.20 - 0.85)      | -0.42 (-0.81 - -0.028) | -0.59 (-0.98 - -0.19)  | -0.20 (-0.64 - 0.24)   |
| £35,001 - £48,000                      | 0.29 (-0.054 - 0.63)    | -0.23 (-0.64 - 0.19)   | -0.44 (-0.86 - -0.026) | -0.11 (-0.60 - 0.37)   |
| >£48,001                               | 0.58 (0.26 - 0.90)      | -0.47 (-0.85 - -0.088) | -0.60 (-0.98 - -0.22)  | -0.16 (-0.60 - 0.28)   |

|                              |                         |                        |                        |                        |
|------------------------------|-------------------------|------------------------|------------------------|------------------------|
| Prefer not to say            | 0.54 (0.24 - 0.85)      | 0.0019 (-0.36 - 0.37)  | -0.23 (-0.60 - 0.14)   | -0.055 (-0.47 - 0.36)  |
| Is Married                   | 0.092 (-0.082 - 0.27)   | -0.09 (-0.30 - 0.12)   | -0.20 (-0.40 - 0.011)  | -0.19 (-0.42 - 0.035)  |
| English as a first language  | 0.64 (0.33 - 0.95)      | 0.11 (-0.24 - 0.46)    | 0.19 (-0.16 - 0.54)    | 0.11 (-0.27 - 0.49)    |
| <b>Neural injury markers</b> |                         |                        |                        |                        |
| Tau                          | -0.079 (-0.16 - 0.0039) | -0.042 (-0.14 - 0.056) | -0.026 (-0.12 - 0.071) | -0.03 (-0.14 - 0.076)  |
| NfL                          | 0.029 (-0.098 - 0.16)   | -0.026 (-0.18 - 0.12)  | -0.072 (-0.22 - 0.078) | -0.068 (-0.23 - 0.094) |
| GFAP                         | -0.039 (-0.15 - 0.074)  | 0.072 (-0.068 - 0.21)  | 0.058 (-0.083 - 0.20)  | 0.0025 (-0.15 - 0.15)  |

**Supplementary Table 5:** Results of the analysis of individual cognitive domains. Regression coefficients and 95% confidence intervals for the association between neural injury markers (independent variables) and individual domains of the Montreal Cognitive Assessment (MoCA; dependent variables) recorded at 6 months post-COVID-19.

| Cognitive domain    | Neural injury markers     |         |                         |         |                        |         |
|---------------------|---------------------------|---------|-------------------------|---------|------------------------|---------|
|                     | GFAP                      |         | Tau                     |         | NfL                    |         |
|                     | Coefficient (95% CI)      | P-value | Coefficient (95% CI)    | P-value | Coefficient (95% CI)   | P-value |
| MoCA (visuospatial) | -0.068 (-0.15 - 0.017)    | 0.12    | -0.066 (-0.14 - 0.0092) | 0.086   | -0.057 (-0.15 - 0.04)  | 0.25    |
| MoCA (naming)       | 0.017 (-0.068 - 0.10)     | 0.7     | -0.032 (-0.11 - 0.043)  | 0.4     | -0.036 (-0.13 - 0.06)  | 0.47    |
| MoCA (attention)    | 0.053 (-0.04 - 0.15)      | 0.26    | -0.037 (-0.12 - 0.046)  | 0.38    | 0.033 (-0.073 - 0.14)  | 0.55    |
| MoCA (language)     | 0.012 (-0.073 - 0.096)    | 0.79    | -0.036 (-0.11 - 0.039)  | 0.35    | -0.037 (-0.13 - 0.06)  | 0.45    |
| MoCA (abstract)     | -0.0089 (-0.099 - 0.081)  | 0.85    | -0.036 (-0.12 - 0.044)  | 0.38    | -0.021 (-0.12 - 0.081) | 0.69    |
| MoCA (recall)       | -0.00051 (-0.085 - 0.084) | 0.99    | -0.066 (-0.14 - 0.0096) | 0.088   | -0.055 (-0.15 - 0.041) | 0.26    |
| MoCA (orientation)  | 0.059 (-0.033 - 0.15)     | 0.21    | -0.024 (-0.11 - 0.058)  | 0.57    | 0.039 (-0.065 - 0.14)  | 0.47    |

## References

1. Evans RA, McAuley H, Harrison EM, et al. Physical, cognitive, and mental health impacts of COVID-19 after hospitalisation (PHOSP-COVID): a UK multicentre, prospective cohort study. *Lancet Respir Med.* 2021;9(11):1275-1287.
